# Supplementary material for: Modeling hormonal and inflammatory contributions to preterm and term labor using uterine temporal transcriptomics
Source: PubMed Central journal article supplement (PMC4904357; doi:10.1186/s12916-016-0632-4), 2016-06-13

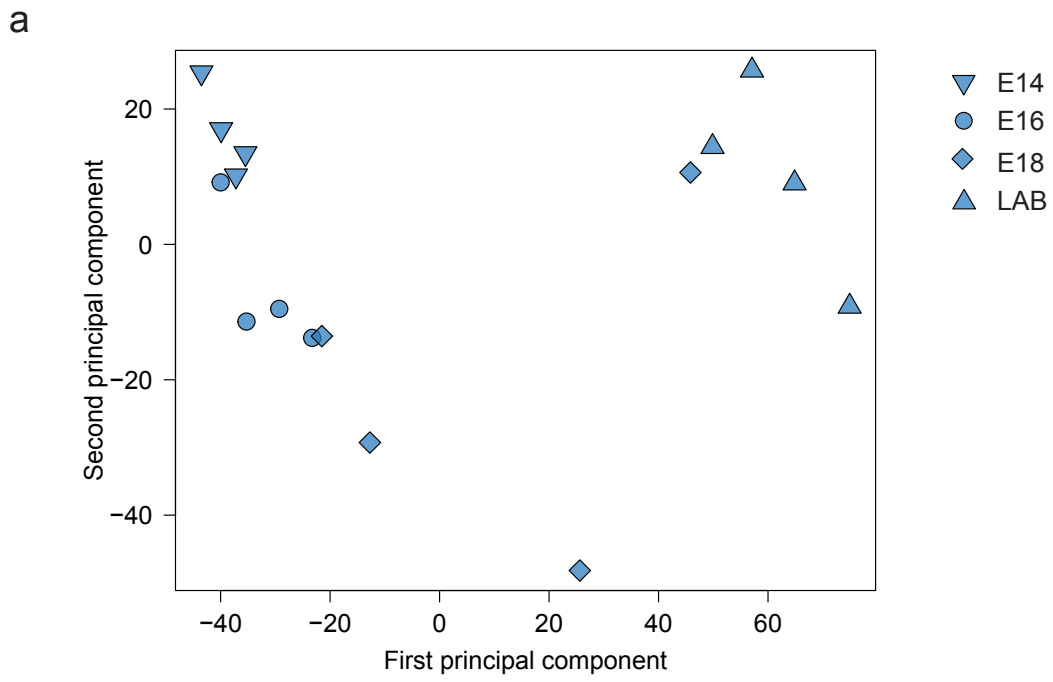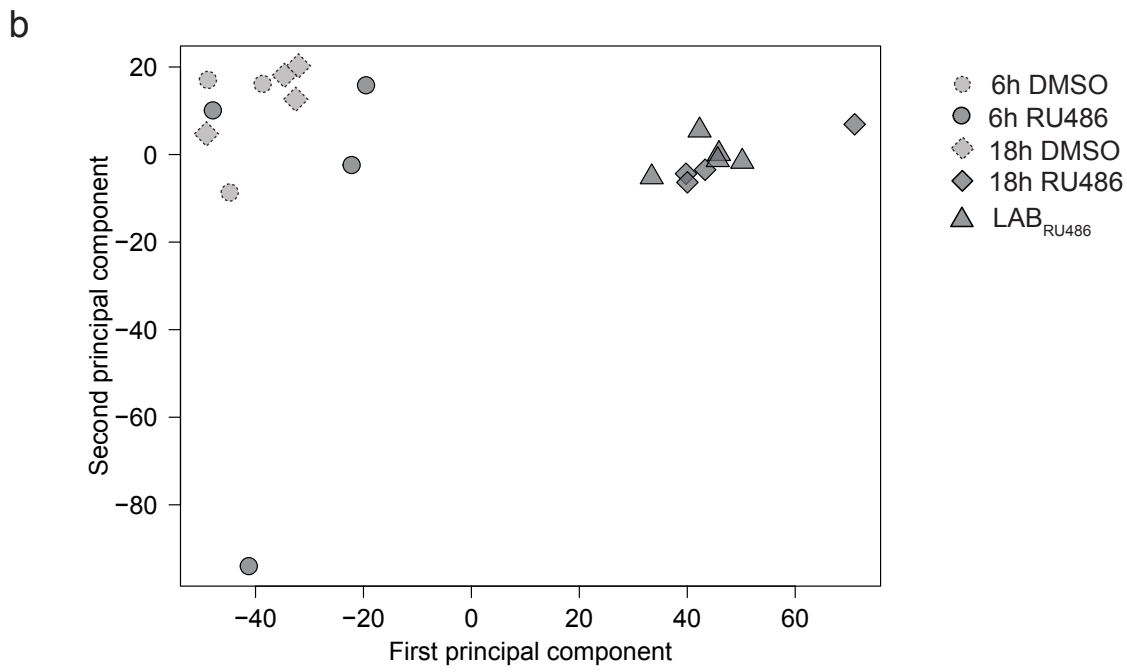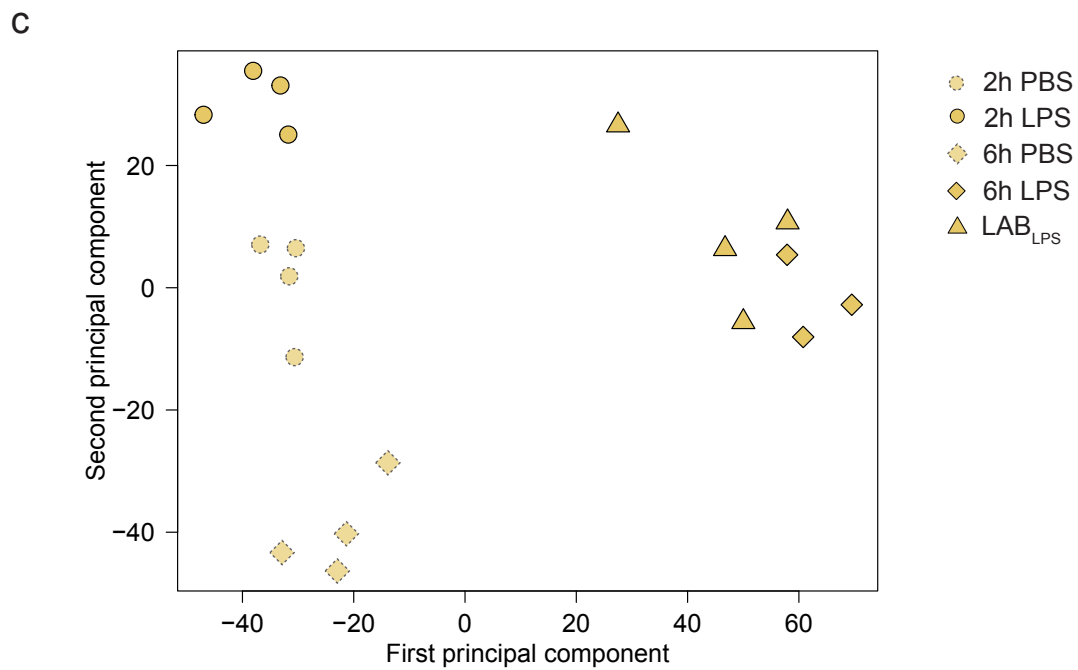

Supplement: 12916_2016_632_MOESM5_ESM.pdf [file 12916_2016_632_MOESM5_ESM.pdf]
